# Supplementary material for: Cupredoxin engineered upconversion nanoparticles for ratiometric luminescence sensing of Cu2+
Source: Royal Society of Chemistry journal article supplement (doi:10.1039/c9na00168a), 2019-01-01
Supplement: c9na00168a1.pdf [file c9na00168a1.pdf]

**ELECTRONIC SUPPLEMENTARY INFORMATION FOR**

**Cupredoxins Engineered Upconversion Nanoparticles for Ratiometric Luminescence Sensing of Cu<sup>2+</sup>**

Chang Liu, Yingjie Yu, Daquan Chen,\* Jian Zhao, Yang Yu, Lele Li\* and Yi Lu\*

---

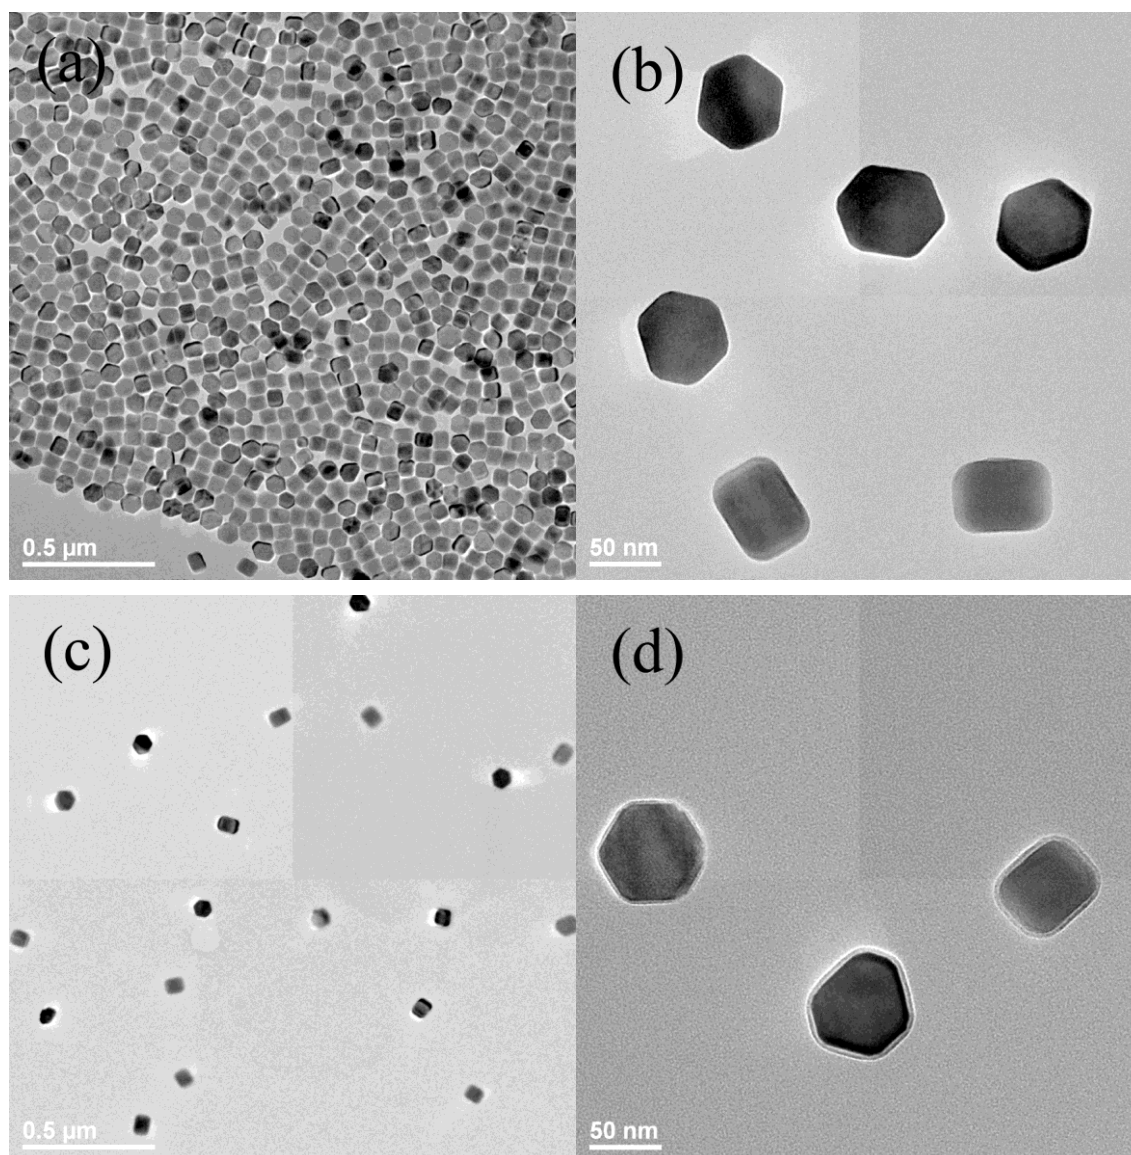

**Figure S1.** TEM images of the (a, b) as-prepared and (c, d) phospholipids DSPC coated UCNPs deposited on TEM grid from a drop of UCNPs cyclohexane solution and DSPC-UCNPs water solution, respectively.

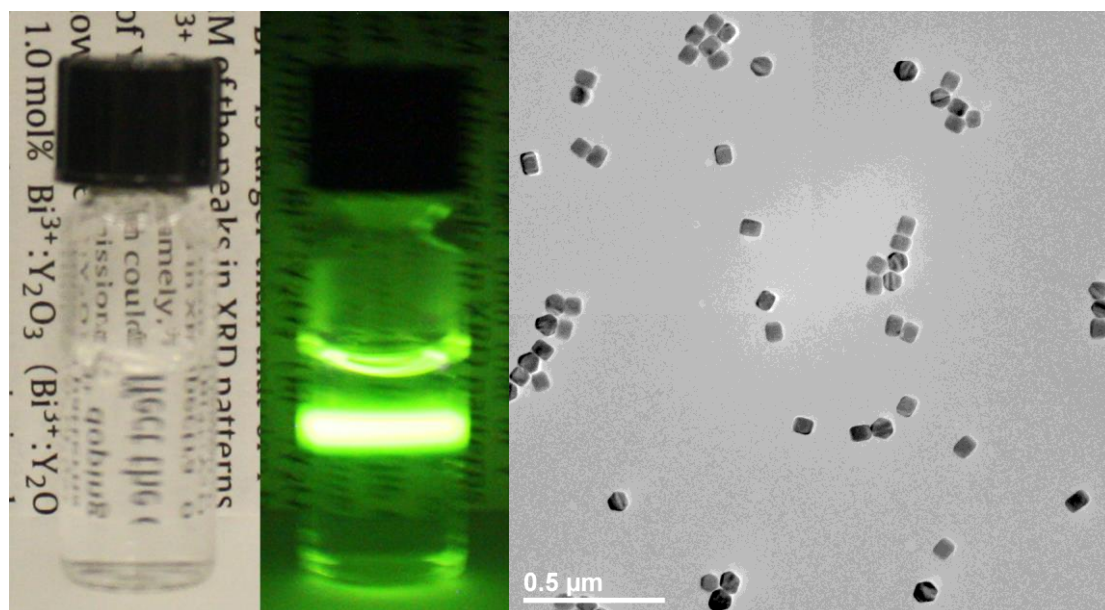

**Figure S2.** (Left) Photographs of the water solution of DSPC-UCNPs stored in water at room temperature for four months without laser illumination and the upconverted visible luminescence under continuous-wave 980 nm laser illumination. (Right) TEM images of the DSPC-UCNPs sample stored in water at room temperature for four months, indicating they remain monodisperse in size without aggregation.

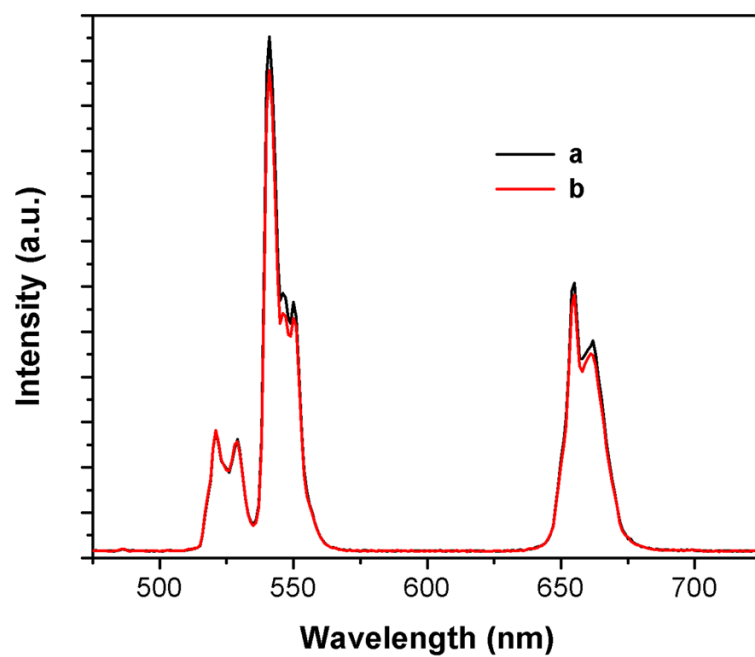

**Figure S3.** Upconversion luminescence spectra of the DSPC-UCNPs in aqueous solution in the absence (a) and presence (b) of 200  $\mu\text{M}$   $\text{Cu}^{2+}$ .

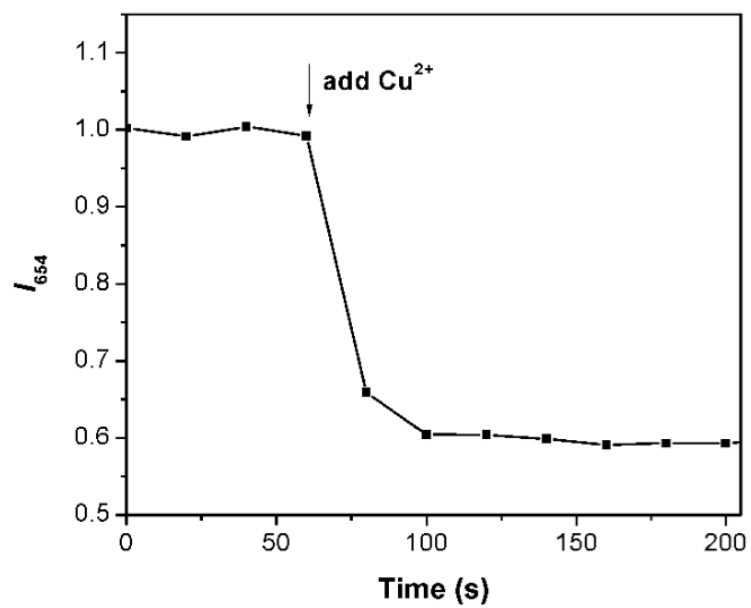

**Figure S4.** Time-dependent upconversion luminescence response of the sensor system with the adding of 70  $\mu\text{M}$   $\text{Cu}^{2+}$ .

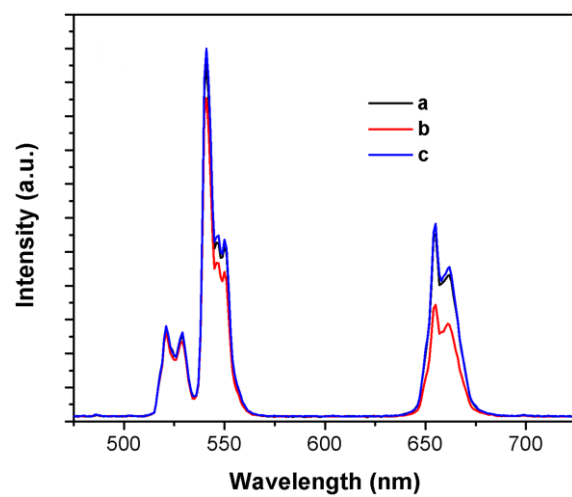

**Figure S5.** Upconversion luminescence spectra of the sensor system in the absence (blank line) and presence (red line) of  $\text{Cu}^{2+}$ , and  $\text{Cu}^{2+}$ -treated hybrid system upon addition of 10 equiv. L-ascorbate acid (blue line).
